# Supplementary material for: Vaccine Hesitancy and Anti-Vaccination Attitudes during the Start of COVID-19 Vaccination Program: A Content Analysis on Twitter Data
Source: MDPI journal article supplement (doi:10.3390/vaccines10020161), 2022-01-21
Supplement: s1 [file s1]

## S1: The search query

**The original search query used for data collection:**

“aşı OR aşıyı OR aşıya OR aşıda OR aşıdan OR aşının OR  
aşılar OR aşıları OR aşılarla OR aşılarda OR aşılarından OR aşıların OR  
aşısı OR aşısını OR aşısına OR aşısında OR aşısından OR aşısının OR  
aşıları OR aşılarını OR aşılarına OR aşılarında OR aşılarından OR aşılarının”

**English translations for search terms**

aşı: the vaccine

aşıyı: the vaccine

aşıya: to the vaccine

aşıda: in the vaccine

aşıdan: from the vaccine

aşının: of the vaccine

aşılar: the vaccines

aşıları: the vaccines

aşılarla: to the vaccines

aşılarda: in the vaccines

aşılarından: from the vaccines

aşıların: of the vaccines

aşısı: [noun] vaccine

aşısını: the [noun] vaccine

aşısına: to the [noun] vaccine

aşısında: in the [noun] vaccine

aşısından: from the [noun] vaccine

aşısının: of the [noun] vaccine

aşıları: [noun] vaccines

aşılarını: the [noun] vaccines

aşılarına: to the [noun] vaccines

aşılarında: in the [noun] vaccines

aşılarından: from the [noun] vaccines

aşılarının: of the [noun] vaccines
