# Supplementary material for: Vaccine Hesitancy and Anti-Vaccination Attitudes during the Start of COVID-19 Vaccination Program: A Content Analysis on Twitter Data
Source: MDPI journal article supplement (doi:10.3390/vaccines10020161), 2022-01-21
Supplement: s1 [file s1]

## S2: Original texts of quotations

Original Turkish texts of quotations for each theme are provided below.

### Poor scientific process

Örnek-1: [Ülke adı] kendi halkına yapmadığı aşığı bizler neden yapıyoruz. Biz türk milleti kobay değiliz

Örnek-2: Pandeminin sona ermesi için tek yol olarak aşilar gösteriliyor. Oysa mevcut aşiların koruyucu olduğuna ve insan sağlığı açısından güvenilir olduğuna dair hiç bir bilimsel veri sunulmamış durumda. Güvenilir olduğu ispatlanmadan, bu aşilar kitlelere uygulanmamalıdır.

### Conspiracy theories

Örnek-1: Siz hala bunlara inanıyor musunuz? Küreselciler ne emir verirse onu söylüyorlar, 2021 yaz aylarında bitecek, sonra 2021 kışı oldu, şimdi 10 yıla uzatmışlar?? bence 2071de biter! Son kararım. Eee hani tünelin sonundaki ışık aşığıydı? Aşilar da işe yaramıyor belli?

Örnek-2: Daha bu işin başlangıcı, Bunları bugün burada durduramaz isek, Allah fırsat vermesin, bir sonraki adımları daha tehlikeli olabilir.

Mesele, CoVID, aş, 5G, maske değil anlamadınız mı!

### Suspicion towards manufacturers

Örnek-1: [ülke adı] kendi vatandaşı için aşığı [diğer ülke adı]'dan alsın, bize de faz 3 aşamasındaki henüz yasal olmayan aşığı satsın

Örnek-2: Bugün de "[şirket adı] asisi aktif virüsle, [ülke adı] asisi pasif virüsle yapılmış; [şirket adı] olanlar çok kötü etkilenmiş" rivayetlerini duydum, nedir doğruluk payı hiçbir fikrim yok. Biraz araştırdım pek bir haber göremedim ama dedim ya, güven mekanizması olmadığı için her şey kaos gibi şu an.

### Suspicion towards health authorities

Örnek-1: [bilim insanı adı] ([şirket adı] [aşı markası] vs vs ) ve diğerleri... Bütün aş ve ilaç firmalarının kirli geçmişlerini gösterebilirsiniz. Bütün doktorların ve hizmet ettikleri kurumları da ifşa edebilirsiniz. Bütün devletlerin hangi tarafta olduğunu da... Korkak olma medya.

Örnek-2: sayın bakan artık size inanmıyoruz milletin, esnafın hayatını alt üst ettiniz. #KURSELALDATMACA bunlar. sizin yalanlarınızdan bıktık artık. aşılarınızda güvenmiyoruz aşıda vurulmayacağız [URL]

## Undirected distrust

Örnek-1: Pandemi yalanları ve korku pompalayan kurumlar... Covid bir oyun belkide daha büyük bir oyunun önizlemesi... Aşı bile koca bir muamma...

Örnek-2: Takip edilmeli, göreceğiz bu mutasyon işini neye bağlayacaklar. 2. Dalgadan ziyade, sanki aşırı zorunlu kılmak için bir gerekçe olacağı gibi; zira aşı firmalarının hemen hepsi, aşının mutasyona uğramış virüs üzerinde de etkili olduğunu ilan ettiler..

## Violation of autonomy

Örnek-1: Zorunlu değil ama mecburi aşı dayatmasına razı değiliz #Vatandasdevlettir

Örnek-2: Benim bedenim üzerinden zorla aşı konusu tartışmaya açılacak, ama ben susacağım, araştırmayacağım ve koyun gibi sıraya gireceğim öyle mi ?

## Unsafety

Örnek-1 : O aşının bana yapacağı yan etkiyi kimse bilmiyor başkasını koruyacağım diye bana zarar verebilecek yada beni öldürecek aşırı seçmek yerine seçmemeyi seçerim bunada hakkımız var anladın mı bedenime yapılacak aşırıya deneye ben karar veririm biz karar verimiz ne demek öyle

Örnek-2 : Aşı sonucu, ileri nesillerde sakat doğumlar olursa.. Ki olacak.. (mRNA aşılarının afrika ve hindistanda binlerce sakat doğum örneği var) Zararından tamamen uzaklaşmak için, aşı olmamış nesil, aşı olmuş nesille evlenmemesi lazım. Gör ki, zararı nerelere kadar gidiyor..

## Non necessary

Örnek-1: Gribi aşıyla bitirdin mi ki? Mutasyon virüse aşı olmaz Güçlü bağışıklık gerekli O kadar

Örnek-2: İstemiyoruz aşı olmak falan olmak istemiyoruz. SESİMİZİ DUYAN VARMIIII???? Ben korona oldum evde ilaçsız atlattım. Akrabalarımın ağır geçirenler evde atlattı. Ülkemin yarısı atlattı. Bağışıklık kazandığım birşeyin AŞISINI OLMAK İSTEMİYORUM.

## Ineffectiveness

Örnek-1: Aşı hastalığı bitirecek bir yöntem değil bence. Önemli olan hastalığı kolay atlatmamızı sağlayacak ilaçların geliştirilmesi. Grip aşıları %100 koruyucu değil bu da olmayacak. Herkes grip olur ilaçla iyileşir. Bu kıvama gelmesi tek çözüm.

Örnek-2: Kovid-19 aşısı işe yaramıyor mu? 6 gün önce aşı olan doktor korona virüse yakalandı

## Supporting and opposing people

Örnek-1: [Tartışmalı bir ünlü adı] [ülke adı] aşısını övmüş ve kötüleyenler algı yaratıyorlar demiş umarım neden bu aşığı sorgulamamız gerektiğini anlamışsınızdır.

Örnek-2: Hicbiri aşı olmadı kandırmayın kendinizi çünkü covit diye birşey yok bunu anlamak istemiyorsunuz sizce bu aşığı olurlar mı

## Pandemic denial

Örnek-1: Normal aşı da olsa gerek yok olmayan bi hastalık için,ama nası inancaksın aşı vuruldum diye madyaya çıkanların gerçekten aşı olduğuna,ayrıca 4 5 sene takip edilmeli etkileri.

Örnek-2: Bakın bu fotoğraflar henı çekildi.. Hemde wuhan'da.. bakın Çin sizinle nasıl dalga geçiyor.. insanın olmadığı kabile ülkelerinde bile virus varken.. 2 milyarlık çin dünyayla dalga geçiyor aşı yok tedavi yok virusu bitirdim diyor.. UYANIN ARTIN VİRUS YOK

## Financial concerns

Örnek-1: Asi herkese ücretsiz uygulanacak diyenler simdide ondan kar etme derdinde kdv alacak

Örnek-2: işi iyice ticarete bağladılar ahmet hocam ilk başta ücretsiz dediler sonra 1 doz aşı 10 dolar olacak diye söylentiler var milleti galyaneye getirmeye çalışıyorlar halbuki öyle bir hastalık yok uydurmaca neymiş efendim nüfus planlaması milleti kandırıyorlar...

## Uighurs

Örnek-1: Uygur'lu Türk kardeşlerimize yapılanlar bitmiyor. Üstelik biz bu baskıları, işkenceleri yapan Çin devletinden aşı alarak ekonomilerine destek sağlıyoruz. Aldığımız bu aşılar Uygur'lu kardeşlerimize yapılan bir ihanettir. #UygurlarıadeEdilemez

Örnek-2: Onu bunu bırakında, Uygur'lu Türkleri sözde eğitim adı altına, 500 taneden fazla kampta toplayan bir ülkeden bırak aşı almayı , kapımdan içeri sokmam.

## Religious beliefs

Örnek-1: Biz aşıya karşı değiliz. Haram içerikli aşılar karşıyız. Biz helal ilaç ve helal aşı istiyoruz. #Aşı #İlaç #Helal #Yerli #Milli

Örnek-2: onlarada caiz biz müslümanlarada caiz domuz lu fetüslü MRNA lı genetik kodlamızı değiştirecek aşılar nerde kaldı farkımız.papa maske takmıyor o yönden farkı olsun tabiki kölelik alâmeti maske onlara yakışmaz.
